# Supplementary material for: Stable water isotope signals in tropical ice clouds in the West African monsoon simulated with a regional convection-permitting model
Source: Copernicus journal article supplement (doi:10.5194/acp-22-8863-2022), 2022-07-11
Supplement: Supplementary file 1 [file acp-22-8863-2022-supplement.pdf]

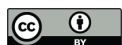

*Supplement of*

## **Stable water isotope signals in tropical ice clouds in the West African monsoon simulated with a regional convection-permitting model**

**Andries Jan de Vries et al.**

*Correspondence to:* Andries Jan de Vries ([andries.devries@env.ethz.ch](mailto:andries.devries@env.ethz.ch))

The copyright of individual parts of the supplement might differ from the article licence.

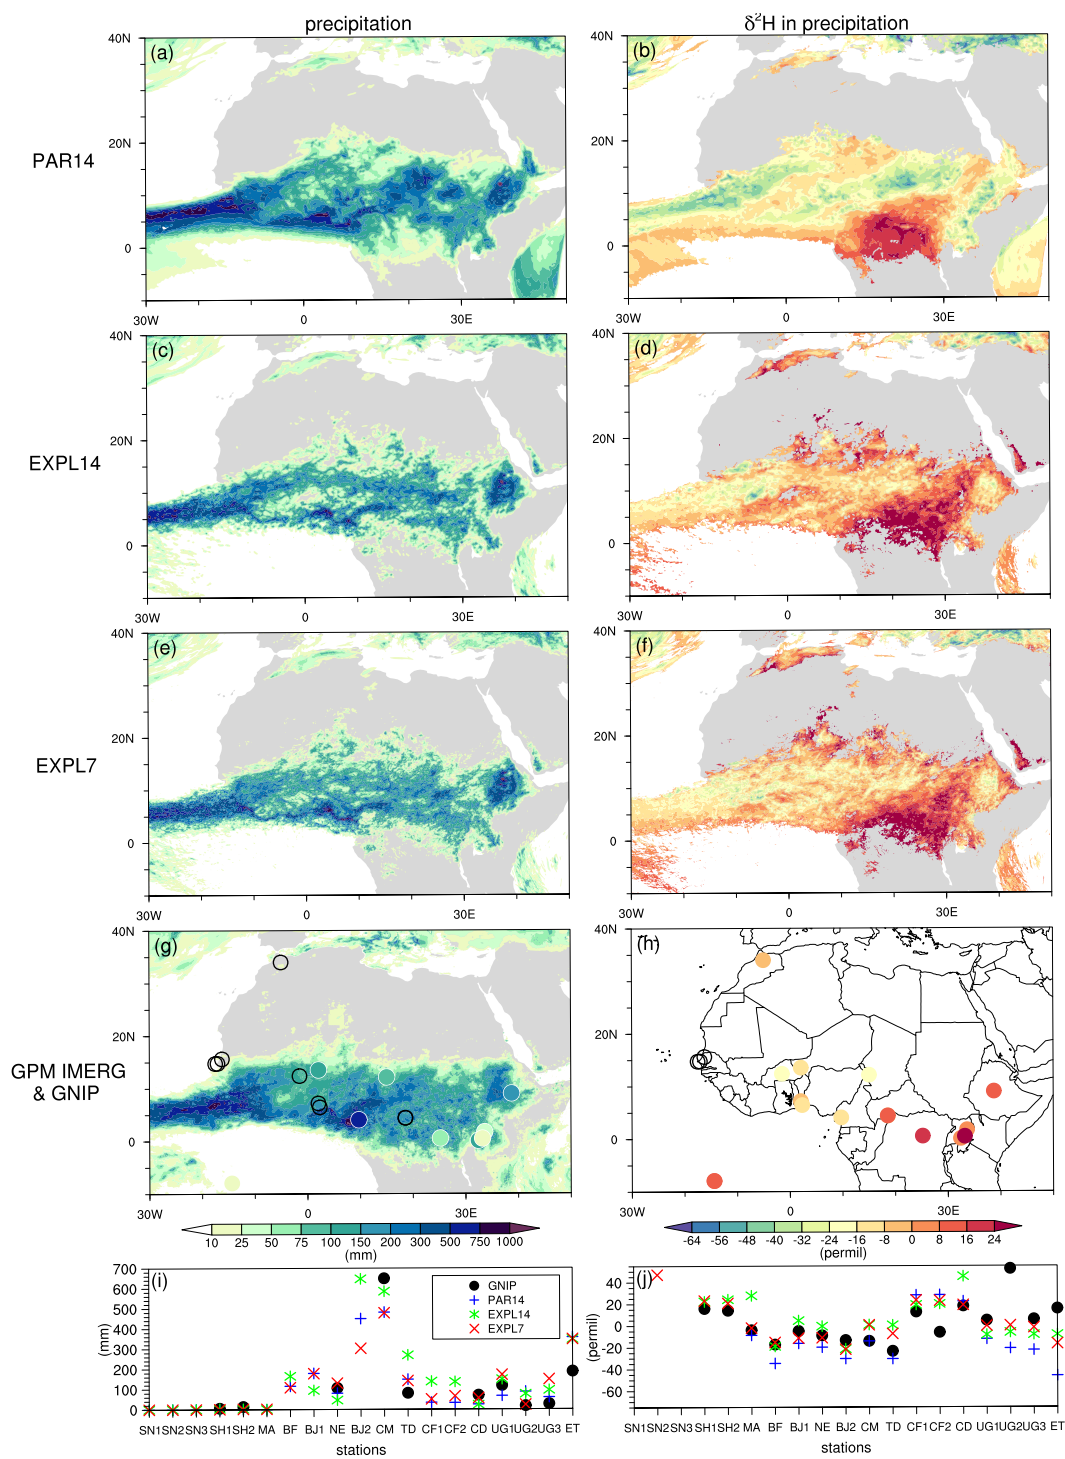

Figure S1. As Fig. 3, but for June 2016.
